# Supplementary material for: Wogonin Suppresses IL‐10 Production in B Cells via STAT3 and ERK Signaling Pathway
Source: Hindawi journal article supplement (doi:10.1155/2020/3032425), 2020-01-01

## Supplementary Materials

Figure S1: Assessment of the purity of CD19<sup>+</sup>B cells.

Figure S2: Effect of wogonin on the viability of LPS-treated B cells. The purified CD19<sup>+</sup> cells from spleen were stimulated with or without LPS in the presence or absence of wogonin (0, 12.5, 25, 50, 100  $\mu$ M) for 6 h, 12 h, 24 h and 48 h. Cells were harvested and the viability was assayed by a CCK8 kit.

Figure S3: Effect of wogonin on the surface molecules of B cell. CD19<sup>+</sup> cells were cultured for 24 h and 48 h in the presence or absence wogonin (12.5  $\mu$ M). (a, b) The expression levels of CD5, CD24, CD21, CD38, CD23, MHCII, IgM, IgD, CD80 and CD86 were measured by FACS at 24 h and 48 h, respectively. (c) Quantification of B cell surface molecules. Data are expressed as mean  $\pm$  SD of three independent experiments. ns, no significance.

Figure S1

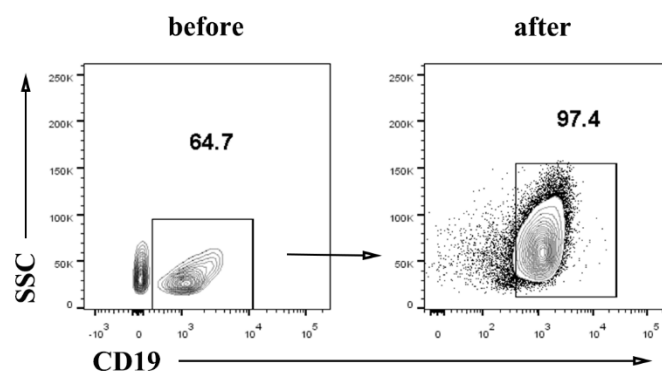

Figure S2

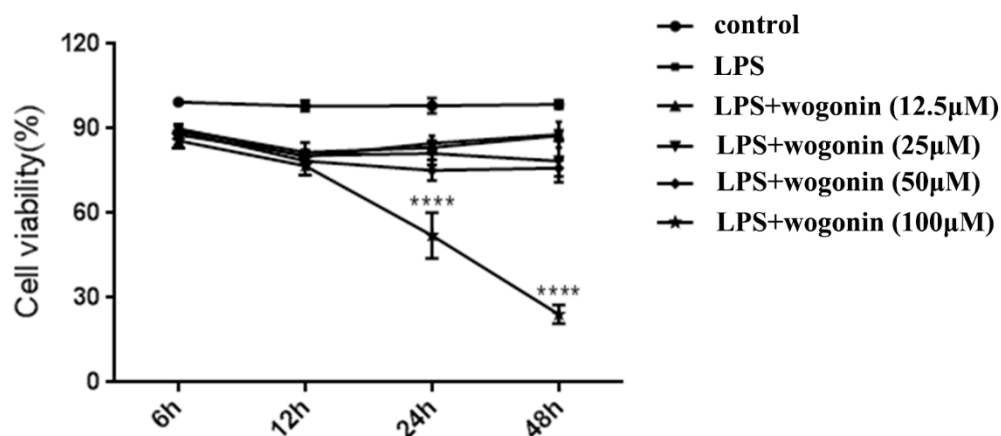

Figure S3

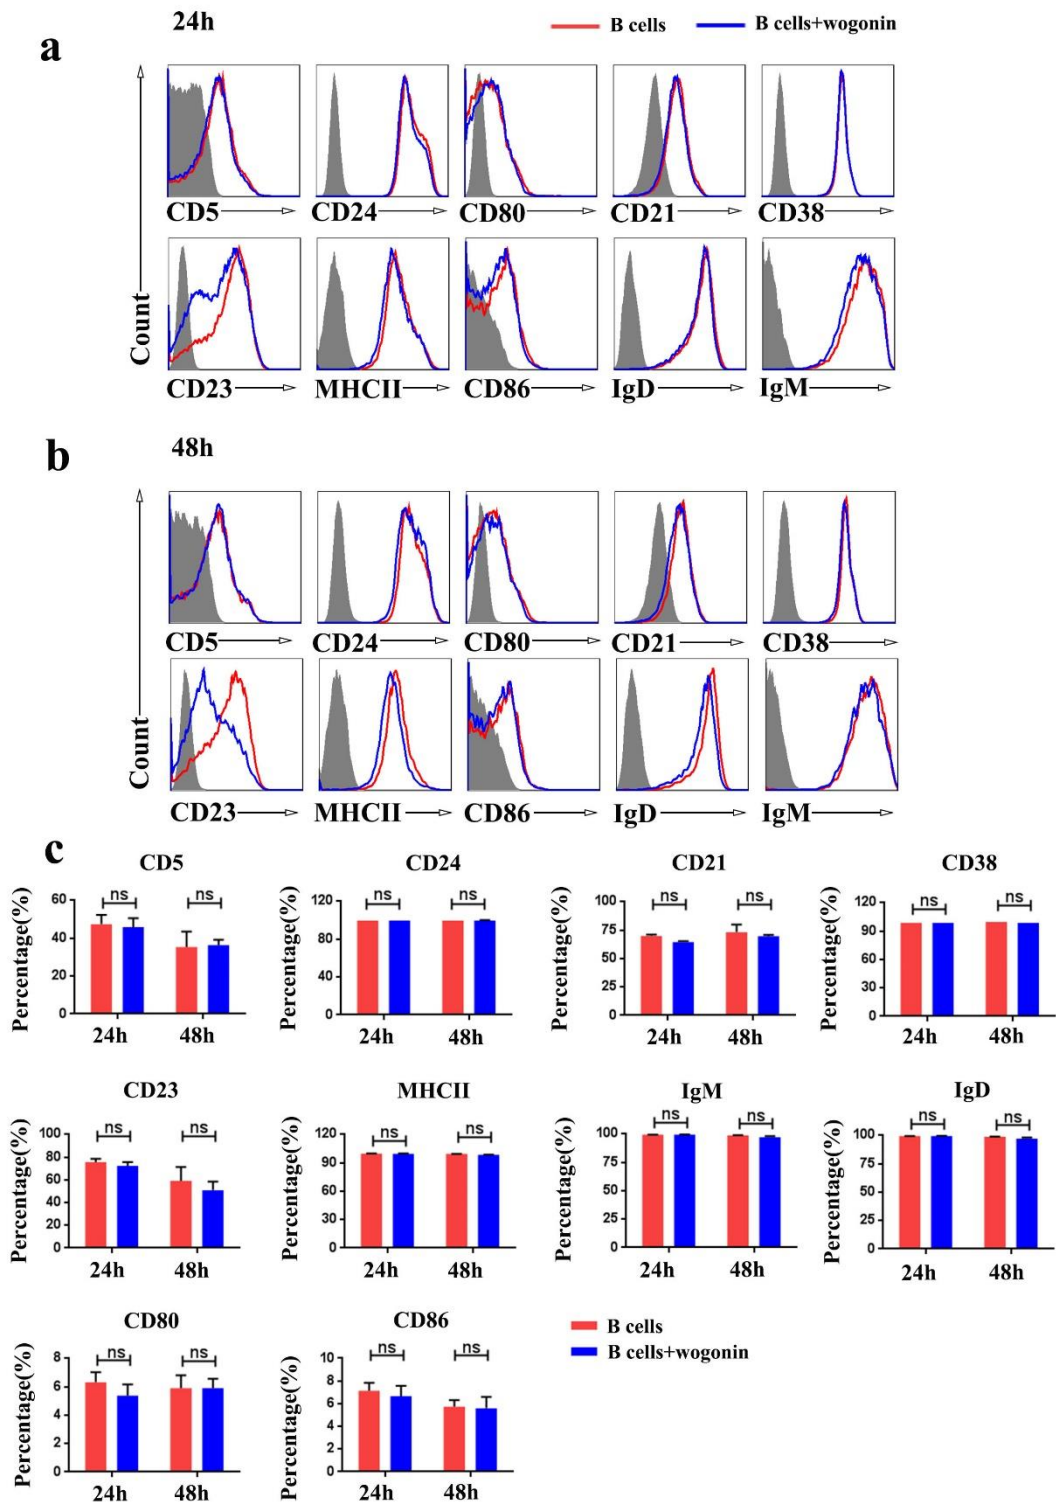

Supplement: f1 [file 3032425.f1.pdf]
